RESEARCH ARTICLE

# Genes regulated by SATB2 during neurodevelopment contribute to schizophrenia and educational attainment

Laura Whitton<sup>1</sup>, Galina Apostolova<sup>2</sup>, Dietmar Rieder<sup>2</sup>, Georg Dechant<sup>2</sup>, Stephen Rea<sup>3</sup>, Gary Donohoe<sup>1</sup>, Derek W. Morris<sup>1\*</sup>

**1** Cognitive Genetics and Cognitive Therapy Group, Neuroimaging, Cognition and Genomics (NICO) Centre and NCBES Galway Neuroscience Centre, School of Psychology and Discipline of Biochemistry, National University of Ireland Galway, Galway, Ireland, **2** Institute for Neuroscience, Medical University of Innsbruck, Innsbruck, Austria, **3** Centre for Chromosome Biology, Discipline of Biochemistry, National University of Ireland Galway, Galway, Ireland

\* [derek.morris@nuigalway.ie](mailto:derek.morris@nuigalway.ie)

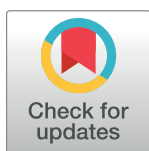

**OPEN ACCESS**

**Citation:** Whitton L, Apostolova G, Rieder D, Dechant G, Rea S, Donohoe G, et al. (2018) Genes regulated by SATB2 during neurodevelopment contribute to schizophrenia and educational attainment. *PLoS Genet* 14(7): e1007515. <https://doi.org/10.1371/journal.pgen.1007515>

**Editor:** John M. Grealley, Albert Einstein College of Medicine, UNITED STATES

**Received:** February 8, 2018

**Accepted:** June 26, 2018

**Published:** July 24, 2018

**Copyright:** ©2018 Whitton et al. This is an open access article distributed under the terms of the [Creative Commons Attribution License](https://creativecommons.org/licenses/by/4.0/), which permits unrestricted use, distribution, and reproduction in any medium, provided the original author and source are credited.

**Data Availability Statement:** All relevant data are within the paper and its Supporting Information files.

**Funding:** This research was supported by Science Foundation Ireland ([www.sfi.ie](http://www.sfi.ie)) grant 12/IP/1670 and Brain and Behavior Research Foundation NARSAD Independent Investigator Award (#25916). The funders had no role in study design, data collection and analysis, decision to publish, or preparation of the manuscript.

## Abstract

*SATB2* is associated with schizophrenia and is an important transcription factor regulating neocortical organization and circuitry. Rare mutations in *SATB2* cause a syndrome that includes developmental delay, and mouse studies identify an important role for *SATB2* in learning and memory. Interacting partners *BCL11B* and *GATAD2A* are also schizophrenia risk genes indicating that other genes interacting with or are regulated by *SATB2* are making a contribution to schizophrenia and cognition. We used data from *Satb2* mouse models to generate three gene-sets that contain genes either functionally related to *SATB2* or targeted by *SATB2* at different stages of development. Each was tested for enrichment using the largest available genome-wide association studies (GWAS) datasets for schizophrenia and educational attainment (EA) and enrichment analysis was also performed for schizophrenia and other neurodevelopmental disorders using data from rare variant sequencing studies. These *SATB2* gene-sets were enriched for genes containing common variants associated with schizophrenia and EA, and were enriched for genes containing rare variants reported in studies of schizophrenia, autism and intellectual disability. In the developing cortex, genes targeted by *SATB2* based on ChIP-seq data, and functionally affected when *SATB2* is not expressed based on differential expression analysis using RNA-seq data, show strong enrichment for genes associated with EA. For genes expressed in the hippocampus or at the synapse, those targeted by *SATB2* are more strongly enriched for genes associated EA than gene-sets not targeted by *SATB2*. This study demonstrates that single gene findings from GWAS can provide important insights to pathobiological processes. In this case we find evidence that genes influenced by *SATB2* and involved in synaptic transmission, axon guidance and formation of the corpus callosum are contributing to schizophrenia and cognition.

**Competing interests:** The authors have declared that no competing interests exist.

## Author summary

Schizophrenia is a complex disorder caused by many genes. Using new gene discoveries to understand pathobiology is a foundation for development of new treatments. Current drugs for schizophrenia are only partially effective and do not treat cognitive deficits, which are key factors for explaining disability, leading to unemployment, homelessness and social isolation. Genome-wide association studies (GWAS) of schizophrenia have been effective at identifying individual SNPs and genes that contribute to risk but have struggled to immediately uncover the bigger picture of the underlying biology of the disorder. Here we take an individual gene identified in a schizophrenia GWAS called *SATB2*, which on its own is a very important regulator of brain development. We use functional genomics data from mouse studies to identify sets of other genes that are influenced by *SATB2* during development. We show that these gene sets are enriched for common variants associated with schizophrenia and educational attainment (used as a proxy for cognition), and for rare variants that increase risk of various neurodevelopmental disorders. This study provides evidence that the molecular mechanisms that underpin schizophrenia and cognitive function include disruption of biological processes influenced by *SATB2* as the brain is being organized and wired during development.

## Introduction

Neocortical organization and circuitry requires the coordinated execution of a series of developmental processes, including the specification of neuronal identity, neuronal migration, and wiring of neural circuits [1]. Special AT-rich sequence-binding protein 2 (*SATB2*) and B-cell lymphoma/leukaemia 11B (*BCL11B*) are two of the several key transcription factors that control the projection identity of cortical neurons (subcortical vs. callosal) during cortical development [2]. *SATB2* modifies higher-order chromatin structure and can mediate chromatin loop formation via self-association in order to regulate other genes [3–6]. *De novo* structural and point mutations in *SATB2* result in *SATB2* haploinsufficiency and *SATB2*-associated syndrome, which is characterised by developmental delay, mild to severe intellectual disability, speech and behavioural problems and abnormal craniofacial features [7].

During development, pyramidal neurons (excitatory projection neurons primarily found in the cerebral cortex [8]) project axons across multiple brain regions and to the corticospinal tract [9]. Based on their projections, pyramidal neurons can be divided into two groups; deep layer neurons (located in cortical layers 5 and 6) projecting to subcortical regions and upper layer neurons (located in cortical layers 2, 3 and 4) projecting across the corpus callosum to the contralateral hemisphere [10]. *SATB2* is required for the projection of upper layer neurons and loss of *SATB2* leads to upper layer neurons incorrectly projecting to subcortical regions [11,12]. In the adult CNS, *SATB2* is critically important as a regulator of synaptic plasticity in the hippocampus that underlies memory functions [13,14].

*SATB2* specifically mediates callosal projection identity by repressing the expression of *BCL11B* (also known as *CTIP2*), a zinc finger protein required for subcortical projection neuron identity [2,11]. *SATB2* directly binds to the *BCL11B* locus and recruits the Ski protein and the nucleosome remodeling deacetylase (NuRD) complex to initiate chromatin modifications inhibiting *BCL11B* expression [12,15]. *BCL11B* is required for the postnatal development of the hippocampus and its loss leads to impaired hippocampal learning and memory in the adult brain [13,16]. GATA zinc finger domain containing 2A (*GATAD2A*; also known as P66-alpha), is a core component of the NuRD complex and mediates the interaction between

histones and other core proteins [17,18]. GATAD2A plays a key role in memory preservation through activity-induced histone modifications[19].

Analysis of just genome-wide significant SNPs for SZ implicated *SATB2*, *BCL11B* and *GATAD2A* in the aetiology of this disorder as epigenetic regulators of neocortical development [20]. We hypothesized that variation in other genes that function with or are regulated by *SATB2* are also contributing to SZ aetiology. Given the high polygenicity of SZ and the weak individual SNP effects detected in GWAS, we decided to move beyond individual SNP analysis and instead performed gene-set analysis (GSA) on three gene-sets that contain genes either functionally related to *SATB2* or targeted by *SATB2* at different stages of development. This makes it possible to detect the effects of multiple weaker associations that may be missed by individual SNP or gene based-analysis.

We tested these *SATB2* gene-sets for a contribution to SZ using the largest available GWAS dataset that used 40,675 cases and 64,643 controls [21]. Given the genetic overlap between SZ and cognition [22], and the facts that *SATB2* has an identified role in memory function[13,14] and that cognitive deficits are present in individuals with *SATB2* syndrome[7], we investigated these gene-sets for a genetic contribution to cognition. We based this analysis on educational attainment (EA), a proxy for cognition based on measuring years of schooling, using the largest available EA GWAS results from 328,917 samples[23]. We also sought independent evidence that these gene-sets contribute to SZ and other neurodevelopmental disorders with cognitive deficits by testing these gene-sets for enrichment of genes that contain *de novo* variants and genes with an increased burden of ultra-rare protein altering variants in SZ cases.

## Results

### Generation of *SATB2* gene-sets

We developed three different gene-sets containing genes that either function together with or are regulated by murine *Satb2* at different stages of development. The first gene-set contains 127 genes (S1 Table), the majority of which (n = 117) are genes that have been reported as differentially expressed in the cortices of *Satb2* mutant mice during neurodevelopment [11,24]. Additionally, the gene-set contains genes considered to be vital components of the NuRD complex [25] as it has been previously shown to facilitate *Satb2*-mediated repression of *Bcl11b* during development. This first gene-set is called *SATB2*+NuRD. The second gene-set is based on data from a single study that generated a dataset of 1,341 ChIP-seq peaks that map binding sites of *SATB2* in cortices of wild type mice at embryonic day (E) 15.5 [24]. By mapping these ChIP-seq peaks to regulatory regions of genes, we generated a set of 778 genes that are targets of and potentially regulated by *SATB2* during cortical development. This second gene-set is called *SATB2*\_Cort (S2 Table). The third gene-set is based on data from a single study that generated a dataset of 5,027 ChIP-seq peaks that map binding sites of *Satb2* in primary hippocampal cell cultures from wild type mice at postnatal day P0 to P1 [13]. We mapped these ChIP-seq peaks to identify 4,138 target genes and called this gene-set *SATB2*\_Hipp (S3 Table). Full details on the generation of each gene-set are supplied in Materials and Methods.

The rationale for three rather than a single gene-set is as follows: *SATB2*+NuRD includes genes that were reported in a number of different studies that used different mouse models and study designs. *SATB2*\_Cort and *SATB2*\_Hipp are based on single studies each using material from different brain regions at different time points during development and we know that *SATB2* has different functions at different stages of development. Combining the three into a single gene-set would miss the opportunity to test for enrichment in SZ and EA GWAS data in these spatially and temporally defined gene-sets that capture *SATB2* function at important brain regions and different developmental time points. S1 Fig shows the overlap between

the three gene-sets. Seven genes are common to all three gene-sets. Gene symbols from each overlapping category are listed in [S4 Table](#).

### Analysis of SATB2+NuRD gene-set

We used MAGMA [26] for GSA to simultaneously study multiple genetic markers in order to determine their joint effect and test if the genes in SATB2+NuRD were more strongly associated with SZ or EA than other genes in the genome. MAGMA uses summary statistics (SNP P values) from GWAS and a significant enrichment within SATB2+NuRD points to variation across those genes influencing SZ and/or EA, and provides further evidence that biological functions related to SATB2 are part of disorder aetiology. The SATB2+NuRD gene-set ( $n = 127$  genes) was enriched for SZ risk genes ( $P = 9.54 \times 10^{-5}$ ) and for genes associated with EA ( $P = 0.0005$ ). We knew SATB2+NuRD contained three genes associated with SZ (*SATB2*, *BCL11B* and *GATAD2A*). To test if these three genes were driving the significant enrichment in SZ, we removed them and re-ran the GSA in the SZ data using a smaller SATB2+NuRD gene-set ( $n = 124$ ). We still detected enrichment of SZ ( $P = 0.001$ ) indicating this gene-set contains multiple other genes associated with SZ.

Brain-expressed genes are a major contributor to SZ [27] and EA [23]. It is possible that the enrichment detected here could be due to the SATB2+NuRD gene-set representing a set of brain-expressed genes. However, the SATB2+NuRD enrichment was robust to the inclusion in the analyses of both 'brain-expressed' ( $n = 14,243$ ) and 'brain-elevated' ( $n = 1,424$ ) gene-sets as covariates (SZ:  $P = 0.0003$  and  $P = 0.0005$  respectively; EA:  $P = 0.0004$  and  $P = 0.0007$  respectively). To examine if the enrichment we detect for SZ and EA is a property of polygenic phenotypes in general, we obtained GWAS summary statistics for 10 phenotypes and we tested SATB2+NuRD for enrichment in each one. These were child-onset psychiatric disorders (attention deficient hyperactivity disorder (ADHD) and autism spectrum disorder (ASD)), adult-onset psychiatric disorders (bipolar disorder (BPD) and obsessive compulsive disorder (OCD)), other brain-related disorders (Alzheimer's disease (AD) and stroke (STR)), and non-brain related diseases (cardiovascular disease (CAD), Crohn's disease (CD), ulcerative colitis (UC) and type 2 diabetes (T2D)). SATB2+NuRD was not enriched for any of the 10 phenotypes ([S2 Fig](#)).

### Analysis of SATB2\_Cort gene-set

The SATB2\_Cort gene-set ( $n = 778$  genes) was enriched for EA genes ( $P = 0.0068$ ) but not for SZ risk genes ( $P = 0.26$ ). The enrichment in SATB2\_Cort for EA was robust to the inclusion of both 'brain-expressed' and 'brain-elevated' gene-sets as covariates ( $P = 0.013$  and  $P = 0.0077$  respectively). When tested for enrichment in 10 other GWAS datasets, SATB2\_Cort only showed one nominally significant enrichment (for ADHD;  $P = 0.021$ ) but this did not survive multiple test correction ([S3 Fig](#)).

The study that reported the SATB2 ChIP-Seq data, which we used to map the SATB2 target genes in the SATB2\_Cort gene-set, also reported 3,129 genes that were differentially expressed in P0 cortices of SATB2 wild-type (WT) v knock-out (KO) mice. We used these data to identify those SATB2 target genes that were differentially expressed and thus functionally impacted by the loss of SATB2. [Fig 1](#) shows that the subset of genes within SATB2\_Cort that are differentially expressed are making a stronger contribution to EA ( $n = 229$  genes;  $P = 0.00016$ ) than those genes that are not differentially expressed ( $n = 513$  genes;  $P = 0.32$ ). Thus, variation in genes that are both targeted by SATB2 and functionally affected when SATB2 is not expressed in the mouse cortex contributes to EA in the general population.

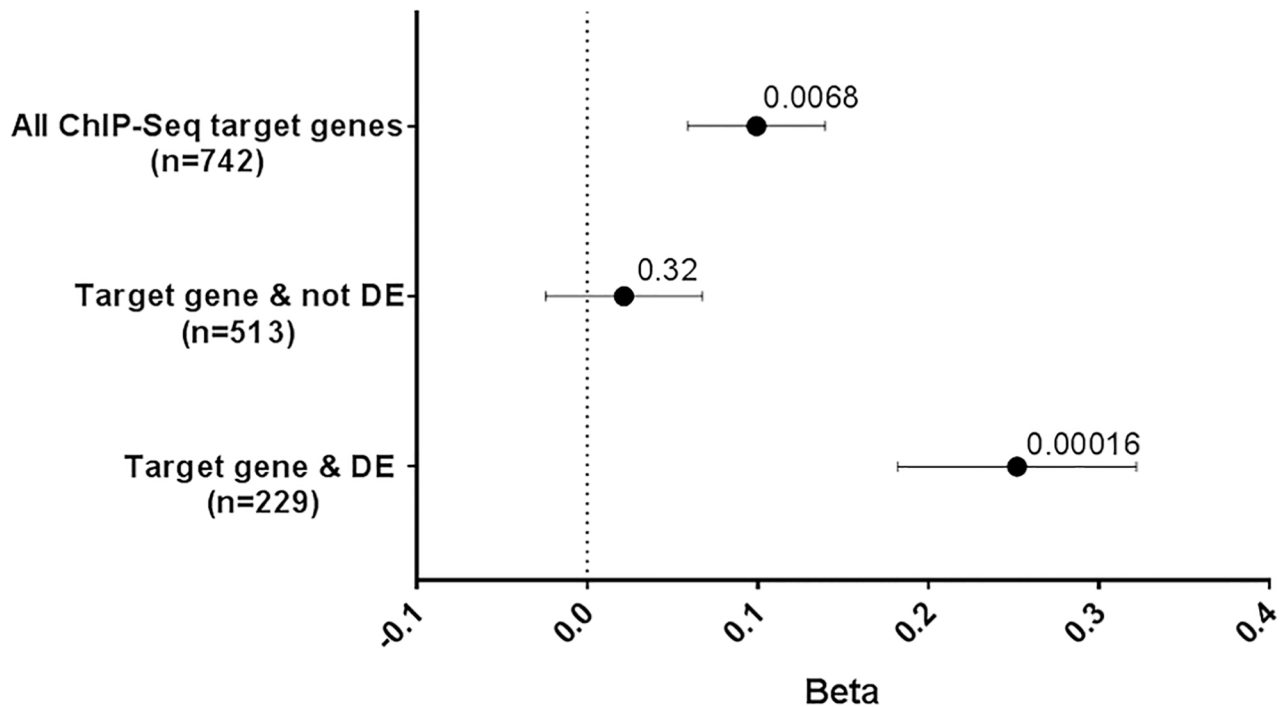

**Fig 1. GSA of SATB2\_Cort in EA, and the partition of these SATB2 target genes into those that were or were not differentially expressed (DE) in P0 cortices of SATB2 WT v KO mice.** Gene-sets and number of genes are plotted on the y-axis. Beta values (effect sizes) as calculated by MAGMA are plotted on the x-axis with P-values shown above each data point. Horizontal bars indicate standard error. The overall enrichment signal (top) appears to be driven by those genes that were DE (bottom), indicating that of genes targeted and potentially regulated by SATB2, it is those functionally impacted by its loss that contribute more to EA.

<https://doi.org/10.1371/journal.pgen.1007515.g001>

Given SATB2’s role in the formation and structural integrity of the cerebral cortex [28], we tested our SATB2\_Cort gene-set for enrichment of genes against intracranial volume [29]. Intracranial volume was chosen because it is closely related to brain volume in early life as the brain develops after which it becomes stable when the brain has fully developed and it remains unaffected by later age-related changes [30,31]. SATB2\_Cort was not enriched for genes associated with intracranial volume and no enrichment was observed for the subset of genes within SATB2\_Cort that showed the strongest enrichment for EA, i.e. those genes that were differentially expressed in the mouse cortex upon SATB2 ablation (S5 Fig).

### Analysis of SATB2\_Hipp gene-set

The SATB2\_Hipp gene-set (n = 4,138 genes) was enriched for SZ risk genes (P = 0.0040) and for EA genes (P = 2.03x10<sup>-6</sup>). The enrichment in SATB2\_Hipp for SZ did not remain significant when we conditioned on the set of ‘brain-expressed’ genes (P = 0.058). The enrichment in SATB2\_Hipp for EA was robust to the inclusion of both ‘brain-expressed’ and ‘brain-elevated’ gene-sets as covariates (P = 3.77x10<sup>-5</sup> and P = 5.74x10<sup>-6</sup> respectively). When tested for enrichment in 10 other GWAS datasets, SATB2\_Hipp only showed two nominally significant enrichments (for ASD (P = 0.028) and CAD (P = 0.040) but these did not survive multiple test correction (S4 Fig).

There was no gene expression data available from the primary hippocampal cell cultures to accompany the ChIP-Seq data used to generate the SATB2\_Hipp gene-set. To further explore this gene-set, we investigated these SATB2 target genes using data on gene expression levels in

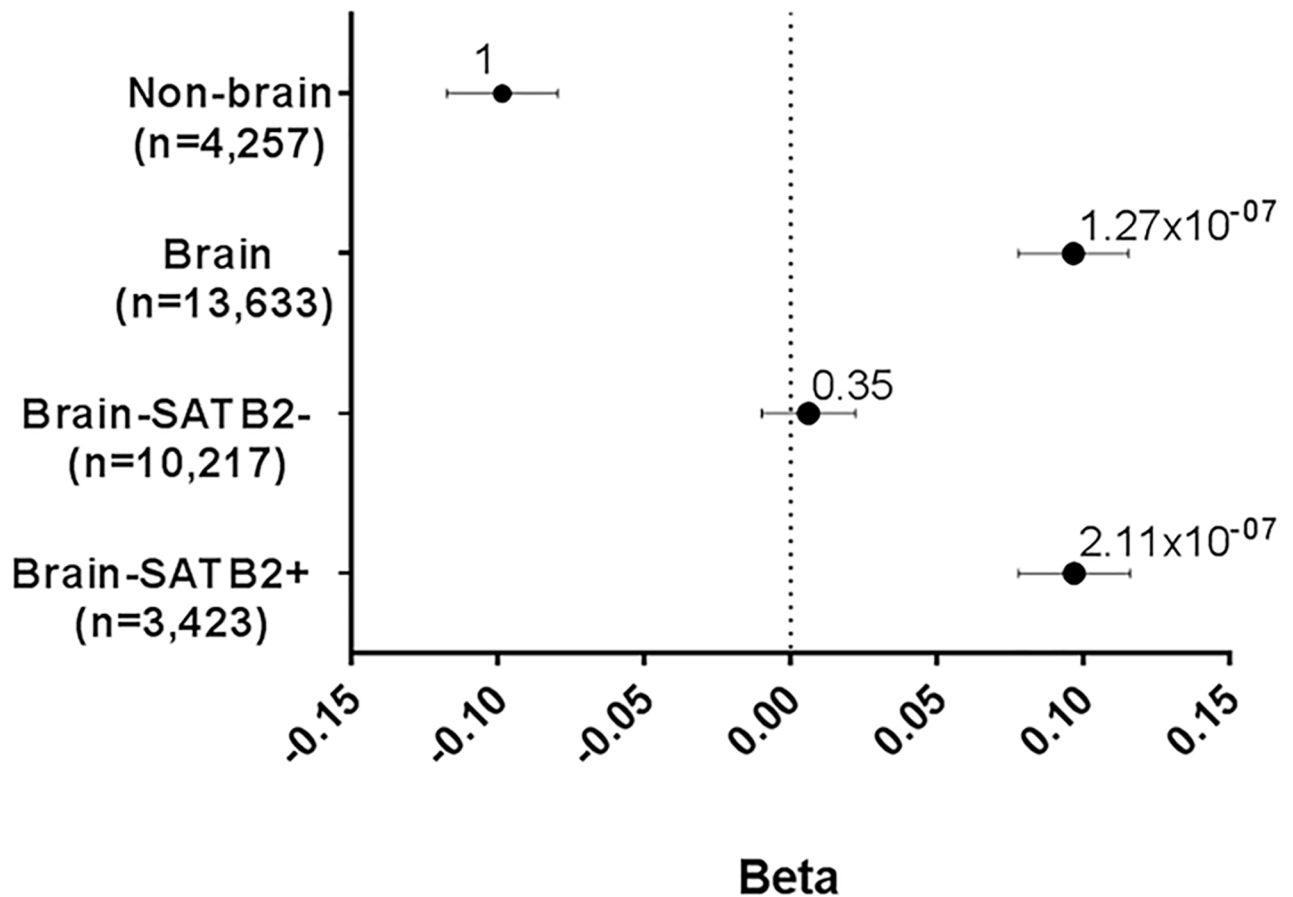

**Fig 2. GSA of SATB2\_Hipp in EA in brain.** Gene-sets and number of genes are plotted on the y-axis. Beta values (effect sizes) as calculated by MAGMA are plotted on the x-axis with P-values shown above each data point. Horizontal bars indicate standard error. Analysis of non-brain and brain expressed genes, with the latter partitioned into SATB2+ or SATB2- based on genes being present in the SATB2\_Hipp gene-set or not.

<https://doi.org/10.1371/journal.pgen.1007515.g002>

(A) the brain, (B) the hippocampus, (C) neurons and (D) at the synapse. (A) Brain expressed genes are strongly enriched for genes associated with EA ( $P = 1.27 \times 10^{-07}$ ) whereas non-brain expressed genes are not ( $P = 1$ ; Fig 2). When we categorise brain expressed genes into those potentially targeted and regulated by Satb2 or not, i.e. those with or without an adjacent Satb2 binding peak (termed SATB2+ and SATB2-), we observed a much stronger enrichment for EA in the SATB2+ genes ( $P = 2.11 \times 10^{-07}$ ) compared to the SATB2- genes ( $P = 0.35$ ; Fig 2).

(B) We used data from human hippocampal samples (from the Brainspan Atlas of the Developing Human Brain) at an early stage of post-natal development (37 post conception weeks (pcw) to 1 year) to capture gene expression levels at an equivalent developmental time point to when the primary hippocampal cell cultures were generated and used in the ChIP-Seq analysis. We categorized genes as having a low, medium or high level of expression in the hippocampus. Genes expressed at a medium and high level in the hippocampus show enrichment for EA genes ( $P = 2.30 \times 10^{-4}$  and  $P = 0.0012$  respectively; Fig 3). We took these medium and high expressed neuronal genes and categorized them into SATB2+ and SATB2- genes. We observed stronger enrichment for SATB2+ genes compared to SATB2- genes in both the medium and high expressed hippocampal genes (Fig 3).

(C) SATB2 functions in neurons where sets of both medium and high expressed genes show enrichment for EA genes ( $P = 0.012$  and  $P = 2.67 \times 10^{-08}$  respectively; Fig 4). We took

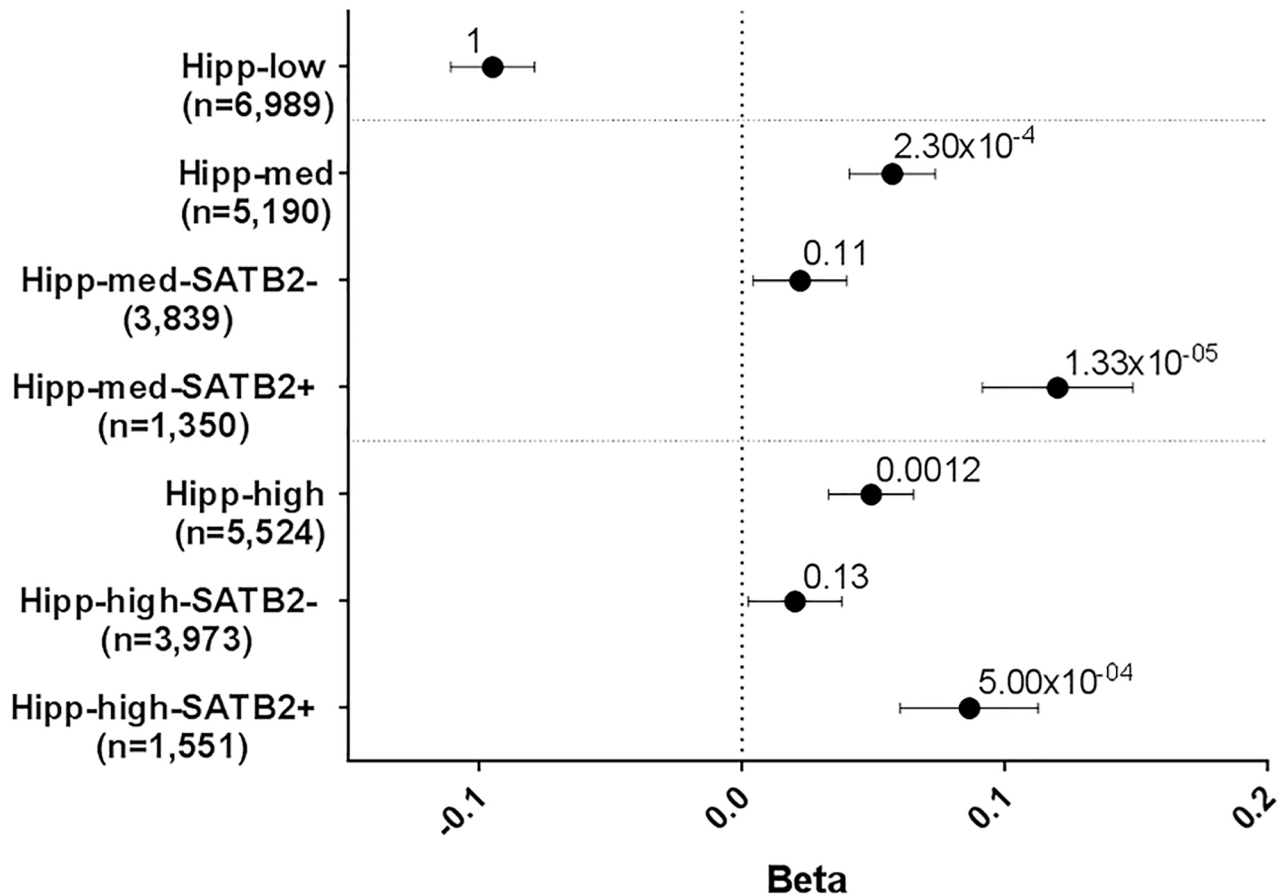

**Fig 3. GSA of SATB2\_Hipp in EA in hippocampus (Hipp).** Gene-sets and number of genes are plotted on the y-axis. Beta values (effect sizes) as calculated by MAGMA are plotted on the x-axis with P-values shown above each data point. Horizontal bars indicate standard error. Genes categorized as low, medium (med) or high expressed based on their expression in the human hippocampus at pcw 37–1 year and partitioned into SATB2+ and SATB2- based on genes being present in the SATB2\_Hipp gene-set or not.

<https://doi.org/10.1371/journal.pgen.1007515.g003>

these medium and high expressed neuronal genes and categorized them into SATB2+ and SATB2- genes. We observed stronger enrichment for SATB2+ genes compared to SATB2- genes in both the medium and high expressed neuronal genes (Fig 4). (D) Given SATB2's role in synaptic plasticity, we next investigated potentially synaptic genes expressed in neurons. For genes highly expressed in neurons, there was stronger enrichment for EA in those that are potentially synaptic ( $P = 2.95 \times 10^{-6}$ ) compared to those that are not potentially synaptic ( $P = 0.0078$ ; Fig 5). Categorizing the potentially synaptic genes as SATB2+ or SATB2-, there was stronger enrichment for EA in the SATB2+ genes ( $P = 2.53 \times 10^{-5}$ ) in EA compared to SATB2- genes ( $P = 0.0071$ ; Fig 5). Together, these data indicate that for genes expressed in the brain, hippocampus, neuron and genes encoding potentially synaptic proteins, those targeted and potentially regulated by Satb2 are contributing more to EA than genes not targeted by Satb2.

We tested SATB2\_Hipp for enrichment of genes associated with hippocampal volume [32]. No significant enrichment was observed for SATB2\_Hipp in the hippocampal volume GWAS data. Similarly, sets of SATB2+ hippocampal or synaptic expressed genes, which had showed enrichment for EA, did not show enrichment for genes associated with hippocampal volume (S6 Fig).

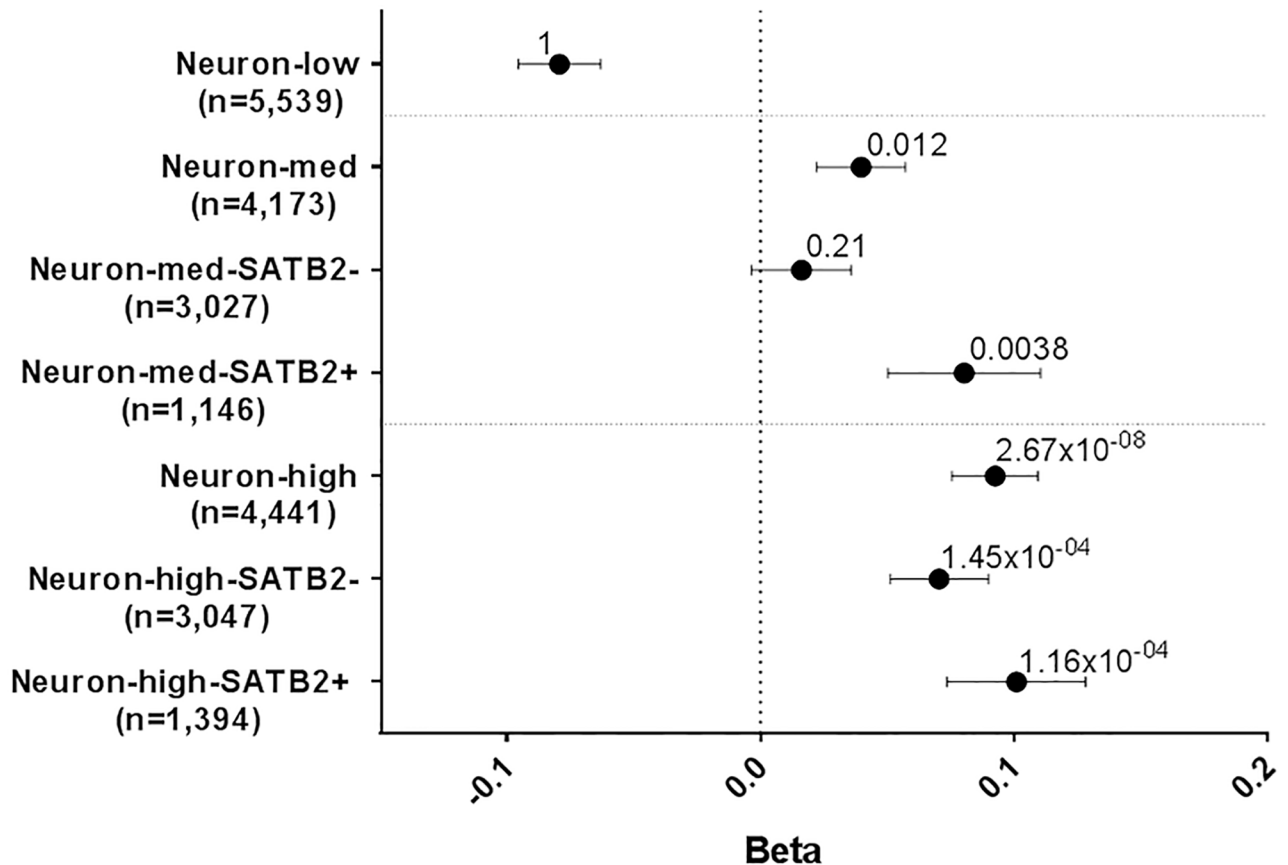

**Fig 4. GSA of SATB2\_Hipp in EA in neurons.** Gene-sets and number of genes are plotted on the y-axis. Beta values (effect sizes) as calculated by MAGMA are plotted on the x-axis with P-values shown above each data point. Horizontal bars indicate standard error. Genes categorized as low, medium (med) or high expressed in neurons with medium and high sets partitioned into SATB2+ and SATB- based on genes being present in the SATB2\_Hipp gene-set or not.

<https://doi.org/10.1371/journal.pgen.1007515.g004>

### Analysis of gene-sets using rare variant data

We studied genes harbouring *de novo* variants identified in patients with SZ, ASD, intellectual disability (ID) and in unaffected siblings and controls [33]. *De novo* variants were categorized as all, loss-of-function (LoF), non-synonymous (NS) and silent and the gene number within each group is detailed in Table 1. Each of the three SATB2 gene-sets contained a significant enrichment of genes containing *de novo* variants for at least one of SZ, ASD or ID, following Bonferroni correction (Table 1). The SATB2+NuRD gene-set was enriched for genes containing *de novo* mutations reported in ASD (both ASD\_all,  $P = 7.00 \times 10^{-06}$  and ASD\_LoF,  $P = 7.25 \times 10^{-04}$ ) and ID (ID\_all,  $P = 5.6 \times 10^{-05}$  and ID\_LoF,  $P = 8.96 \times 10^{-10}$ ). The SATB2\_Cort gene-set was enriched for SZ (SCZ\_all,  $P = 3.67 \times 10^{-04}$ ), ASD (ASD\_all,  $P = 2.03 \times 10^{-04}$  and ASD\_silent,  $P = 3.49 \times 10^{-04}$ ), and ID (ID\_all,  $P = 5.08 \times 10^{-04}$  and ID\_LoF,  $P = 8.63 \times 10^{-08}$ ). The SATB2\_Hipp gene-set was enriched for SZ (SCZ\_all,  $P = 6.75 \times 10^{-04}$ ) and ID (ID\_all,  $P = 9.86 \times 10^{-04}$ ). Importantly, none of the gene-sets were enriched for genes harbouring *de novo* variants reported in the unaffected or control data. Each of the three gene-sets was significantly enriched for genes listed in the Sys ID database of ID genes (Table 1). Finally, the SATB2\_Hipp gene-set was enriched for genes reported to have an excess of disruptive and



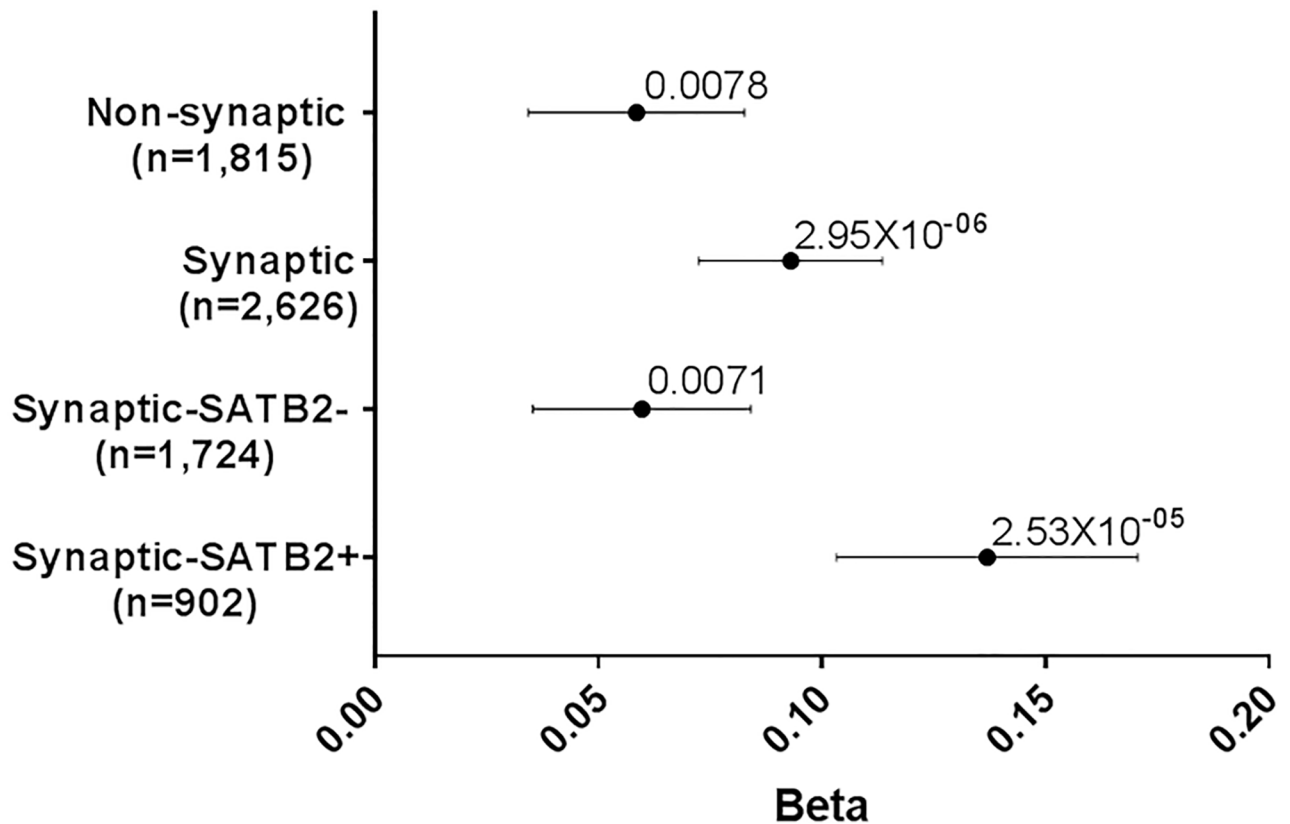

**Fig 5. GSA of SATB2\_Hipp in EA at the synapse.** Gene-sets and number of genes are plotted on the y-axis. Beta values (effect sizes) as calculated by MAGMA are plotted on the x-axis with P-values shown above each data point. Horizontal bars indicate standard error. High expressed genes in neurons were partitioned into those with potentially synaptic functions or not. Those with synaptic functions are further partitioned into SATB2+ or SATB2- based on genes being present in the SATB2\_Hipp gene-set or not.

<https://doi.org/10.1371/journal.pgen.1007515.g005>

damaging ultra-rare variants (dURVs) in SZ patients compared to controls ( $P = 0.0164$ ) based on an exome sequencing study of 12,332 individuals [34].

### Functions of risk genes and gene ontology enrichment analysis of gene-sets

S5 Table lists all genome-wide significant genes within the SATB2\_NuRD (for SZ or EA), SATB2\_Cort (EA only) and SATB2\_Hipp (EA only) gene-sets. This is based on MAGMA gene analysis with Bonferroni correction for numbers of genes tested. For the smaller number of genes from SATB2\_NuRD and SATB2\_Cort, full gene names, their known biology and associated phenotypes are listed in S6 Table. As discussed below, many of these genes have known roles in brain development and are associated with a variety of neurodevelopmental disorders and neurocognitive functions. We performed gene ontology enrichment analysis of EA genes within the larger SATB2\_Hipp gene-set (S7 Table). We detected significant enrichment for neuron development and axon guidance.

### Discussion

The SATB2+NuRD gene-set contains genes that were reported to be differentially expressed in the developing neocortex of *Satb2* mutant mice, and genes encoding components of the NuRD complex. The data presented here show that the SATB2+NuRD gene-set is enriched for genes

**Table 1. Enrichment analysis of gene-sets for genes harbouring *de novo* variants SZ, ASD and ID, for SysID genes and for genes with an excess of dURVs in SZ.**

| Gene Group       | Gene N | SATB2+NuRD                    |      |        |       | SATB2_Cort                     |      |        |      | SATB2_Hipp                     |      |        |      |
|------------------|--------|-------------------------------|------|--------|-------|--------------------------------|------|--------|------|--------------------------------|------|--------|------|
|                  |        | P-Value                       | OR   | 95% CI |       | P-value                        | OR   | 95% CI |      | P-value                        | OR   | 95% CI |      |
| SZ_all           | 903    | 0.140                         | 1.66 | 0.84   | 3.28  | <b>3.67x10<sup>-04*</sup></b>  | 1.69 | 1.26   | 2.25 | <b>6.75 x10<sup>-04*</sup></b> | 1.31 | 1.12   | 1.54 |
| SZ_LoF           | 111    | 0.725                         | 1.42 | 0.20   | 10.28 | 0.144                          | 1.76 | 0.82   | 3.80 | 0.109                          | 1.41 | 0.92   | 2.17 |
| SZ_NS            | 576    | 0.225                         | 1.66 | 0.73   | 3.78  | 0.003                          | 1.70 | 1.20   | 2.41 | 0.003                          | 1.33 | 1.10   | 1.62 |
| SZ_silent        | 216    | 0.594                         | 1.46 | 0.36   | 5.95  | 0.149                          | 1.54 | 0.85   | 2.76 | 0.202                          | 1.23 | 0.89   | 1.69 |
| ASD_all          | 998    | <b>7.00x10<sup>-06*</sup></b> | 3.07 | 1.84   | 5.14  | <b>2.03 x10<sup>-04*</sup></b> | 1.69 | 1.28   | 2.23 | 0.060                          | 1.16 | 0.99   | 1.36 |
| ASD_LoF          | 138    | <b>7.25x10<sup>-04*</sup></b> | 4.83 | 1.76   | 13.28 | 0.375                          | 1.41 | 0.66   | 3.03 | 0.007                          | 1.66 | 1.14   | 2.41 |
| ASD_NS           | 608    | 0.002                         | 2.74 | 1.43   | 5.26  | 0.039                          | 1.46 | 1.02   | 2.11 | 0.321                          | 1.10 | 0.91   | 1.34 |
| ASD_silent       | 252    | 0.007                         | 3.24 | 1.31   | 8.00  | <b>3.49 x10<sup>-04*</sup></b> | 2.28 | 1.43   | 3.62 | 0.723                          | 1.06 | 0.78   | 1.44 |
| ID_all           | 158    | <b>5.60x10<sup>-05*</sup></b> | 5.30 | 2.14   | 13.16 | <b>5.08 x10<sup>-04*</sup></b> | 2.58 | 1.48   | 4.49 | <b>9.86 x10<sup>-04*</sup></b> | 1.77 | 1.25   | 2.49 |
| ID_LoF           | 32     | <b>8.96x10<sup>-10*</sup></b> | 16.0 | 4.83   | 53.47 | <b>8.63x10<sup>-08*</sup></b>  | 7.15 | 3.08   | 16.6 | 0.055                          | 2.02 | 0.97   | 4.19 |
| ID_NS            | 101    | 0.088                         | 3.20 | 0.78   | 13.13 | 0.083                          | 1.96 | 0.90   | 4.24 | 0.052                          | 1.54 | 0.99   | 2.39 |
| ID_silent        | 25     | 0.685                         | 6.07 | 0.82   | 45.15 | 0.320                          | 1.01 | 0.14   | 7.48 | 0.058                          | 2.17 | 0.96   | 4.90 |
| Unaff/con_all    | 579    | 0.442                         | 1.42 | 0.58   | 3.49  | 0.041                          | 1.47 | 1.01   | 2.15 | 0.388                          | 1.09 | 0.89   | 1.34 |
| Unaff/con_LoF    | 56     | 0.543                         | 2.71 | 0.37   | 19.70 | 0.190                          | 1.95 | 0.70   | 5.41 | 0.633                          | 1.16 | 0.62   | 2.17 |
| Unaff/con_NS     | 368    | 0.077                         | 2.21 | 0.90   | 5.43  | 0.072                          | 1.52 | 0.96   | 2.40 | 0.272                          | 1.15 | 0.90   | 1.48 |
| Unaff/con_silent | 155    | 0.317                         | 0.99 | 0.14   | 7.19  | 0.349                          | 1.41 | 0.69   | 2.88 | 0.865                          | 1.03 | 0.70   | 1.53 |
| SysID genes      | 960    | <b>0.001*</b>                 | 2.44 | 1.40   | 4.27  | <b>1.08x10<sup>-06*</sup></b>  | 1.99 | 1.53   | 2.58 | <b>1.49x10<sup>-07*</sup></b>  | 1.48 | 1.28   | 1.72 |
| dURVs in SZ      | 42     | 0.597                         | 3.61 | 0.49   | 26.43 | 0.054                          | 2.66 | 0.95   | 7.46 | <b>0.016*</b>                  | 2.13 | 1.13   | 4.01 |

\* Survives Bonferroni correction.

<https://doi.org/10.1371/journal.pgen.1007515.t001>

associated with SZ and with EA. It is also enriched for genes harbouring *de novo* variants that have been reported in ASD and ID and for ID genes as listed by SysID. Thus, both analyses of common and rare variants indicate that genes in this set are contributing to the aetiology of SZ, EA and neurodevelopment disorders that involve cognitive dysfunction.

The prenatally-derived SATB2\_Cort gene-set is enriched for genes associated with EA. Importantly, the enrichment signal is being driven by those genes that are not only targeted by SATB2 but are also differentially expressed when SATB2 is knocked out. Thus, genes functionally impacted by SATB2 and by extension the processes regulated by SATB2 may represent the molecular mechanisms that underpin EA. Reviewing the genome-wide significant genes for SZ or EA within the SATB2\_NuRD and SATB2\_Cort gene-sets provides insights into the biological processes that are affected during brain development (S6 Table). A number of the risk genes have known roles in synaptic transmission (*KCNN2* [35], *SLC32A1* [36], *EXOC4* [37]), axon guidance and formation of the corpus callosum (*DCC* [38], *NFIB* [39–41], *BCL11B* [11,16,38,42], *TBR1* [2,43,44]), axon regeneration and neurite branching (*KLF9*[45]), neurite outgrowth and axonogenesis (*FOXP2* [46,47], *NEGR1* [48]), maturation and maintenance of upper-layer cortical neurons (*ATXN1* [49]), cortical cell migration (*AFF3* [50]) and the development of specific sensory circuits in the CNS (*MEF2C* [51], *SEMA6D* [52,53]). Many of these genes are the locations of rare causative mutations for neurodevelopment disorders and have also been associated with neurocognitive functions (S6 Table). This indicates that for these phenotypes, common variants of small effect and rare variants of large effect impact on some of the same genes involved in neocortical organization and circuitry.

Results for SATB2\_Cort indicate this gene-set is enriched for genes associated with EA but not SZ. However, analysis of rare variant data shows that this gene-set is enriched for genes carrying *de novo* variants reported for SZ, as well as for ASD and ID. It is possible that there

are molecular mechanisms here where common low effect variants are contributing to EA but rare higher effect variants contribute to SZ.

The postnatally-derived SATB2\_Hipp gene-set is enriched for genes associated with EA. Further analyses using this gene-set identified a consistent phenomenon: For genes that are expressed in the brain, or hippocampus, or in neurons, or at the synapse, there is an enrichment of genes associated with EA but the effect is stronger for the subsets of genes that are targeted by SATB2. Again, these data indicate that the processes regulated by SATB2 may represent the molecular mechanisms that underpin EA.

There is relatively little overlap of SATB2 targets when comparing SATB2\_Cort to SATB2\_Hipp. Beyond the temporal and spatial differences in how the ChIP-seq data was produced, and the different experimental procedures used (S8 Table), this also reflects that the role of SATB2 in the postnatal brain differs greatly to its role in the prenatal brain. Compared to the prenatal brain, SATB2 expression extends from the cortex and into the hippocampus and hypothalamus of the adult brain[54]. It plays a crucial role in both long-term and working memory and mediates late long-term potentiation and synaptic plasticity in the postnatal hippocampus [13,14]. SATB2\_Hipp is enriched for genes associated with EA, for genes harbouring *de novo* variants for SZ and ID and for genes containing dURVs in SZ, suggesting there is an active pathophysiology in the postnatal brain. At a molecular level, these SATB2 target genes may influence cognitive function via biological processes such as BDNF signalling, epigenetic chromatin modifications and miRNA dysregulation [13]. That impaired fear memory caused by deletion of *Satb2* in pyramidal neurons was successfully rescued through restoration of *Satb2* expression in mouse hippocampus [13] indicates that intervention to restore normal cognitive function may be possible if the molecular mechanisms can be targeted.

EA is a good, though not perfect, proxy for cognitive ability [55] and its specific utility for GWAS is that very large samples have been available for analysis. As new large GWAS for neurocognitive phenotypes, and for SZ, are produced, it will be important to determine if genetic variation within biological processes regulated by SATB2 influence specific traits or instead exert an influence across multiple behavioural and neuropsychiatric phenotypes.

SATB2 is required for the correct formation and structural integrity of regions in the brain such as the cerebral cortex [28], the corpus callosum [11] and the hippocampus [14]. Disrupted expression of SATB2 in these regions can result in anatomical and functional abnormalities associated with a range of behavioural phenotypes [13,14,56,57]. Our analysis of neuroimaging GWAS provided no evidence that SATB2 influences intracranial or hippocampal volume but this too needs further study in larger datasets to determine if SATB2's influence on SZ risk or cognitive function is mediated via effects on brain structures.

In summary, we have built on single gene associations detected in GWAS of SZ to show that genes that are functionally related to SATB2 and the NuRD complex during neocortical development or are targeted by SATB2 in the pre- and postnatal brain are enriched for common variants associated with SZ and EA, and for rare variants that increase risk of SZ and other neurodevelopmental disorders. These findings are supported by the existing *Satb2* mouse models demonstrating deficiency in long-term and working memory upon *Satb2* ablation. Thus, this study provides evidence that the molecular mechanisms that underpin SZ and cognitive function include perturbations of the biological processes influenced by SATB2 in the brain.

## Materials and methods

### Ethics statement

Data were directly downloaded from published studies and no additional ethics approval was needed. Each study is referenced and details on ethics approval are available in each manuscript.

## Generation of gene-sets

A study by Alcamo et al. [11] mapped *Satb2* expression in developing cortex and showed that *Satb2* mutant mice display altered expression of 28 genes associated with axon projection, including *BCL11B* at E18.5. A more recent study by McKenna et al. [24] performed RNA-seq analysis of cortices at postnatal day P0 to study differentially expressed genes (DEGs) between wild type and *Satb2*-deficient mice. This led to the identification of 74 DEGs in the deep layers and 15 DEGs in the upper layers of *Satb2*-deficient cortices. The list of genes from these two studies ( $n = 117$ ) was increased using data from other studies of *Satb2* mouse models [2,15,38]. We also included in this set genes considered to be vital components of the NuRD complex [25] as it has been previously shown to facilitate *Satb2*-mediated repression of *Bcl11b* during development [5,12]. Altogether, following conversion of murine gene IDs to orthologous human gene IDs, a total of 127 genes (including *SATB2*, *BCL11B* and *GATAD2A*) were included in this first gene-set named *SATB2+NuRD* (S1 Table).

The second gene-set was generated using a dataset of 1,341 ChIP-seq peaks (GEO accession: GSE68910) that map binding sites of *SATB2* in cortices of wild type mice at E15.5 [24]. ChIP-seq reads were mapped against the mouse NCBI37/mm9 assembly. Functional annotation tool GREAT (<http://bejerano.stanford.edu/great/public/html/index.php>) was used to associate both proximal and distal input ChIP-seq peaks with their putative target genes and thereby identify genes that may be regulated by *SATB2* [58]. We used the default basal plus extension approach within GREAT where each gene in the genome is assigned a basal regulatory domain of a minimum distance of 5kb upstream and 1kb downstream of the transcription start site of the canonical isoform of the gene (regardless of other nearby genes). The gene regulatory domain is extended in both directions to the nearest gene's basal domain but no more than the maximum extension of 1,000kb in one direction. In addition, GREAT utilizes a set of literature curated regulatory domains that extend the regulatory domain for each gene to include its known regulatory element. GREAT mapped 1,341 ChIP-seq peaks to 1,800 unique gene IDs. For only 144 of these genes, the peak was located 5kb upstream or 1kb downstream of the gene. Given the large default extension region applied in GREAT, this may have led to a number of spurious results. We filtered the peaks mapping to the remaining 1,656 genes by overlapping them with defined enhancers from ENCODE (<http://chromosome.sdsc.edu/mouse>) to provide extra support for a potential regulatory role. A total of 452 peaks overlapped with mouse brain-specific enhancers (E14.5) and were mapped back to 712 of the 1,656 genes. This resulted in a final set of 856 mouse genes where a *SATB2* ChIP-seq peak maps to regulatory regions of those genes. The Ensembl data-mining tool BioMart (<http://www.ensembl.org/index.html>) was then used to convert these mouse gene IDs to human gene IDs, which resulted in a final set of 778 human genes. This second gene-set was named *SATB2\_Cort* (S2 Table).

The third gene-set was generated using a dataset of 5,027 ChIP-seq peaks (GEO accession: GSE77005) that map binding sites of *Satb2* in primary hippocampal cell cultures from wild type mice at postnatal day P0 to P1 [13]. This dataset represents the high-confidence peak list derived from two independent biological ChIP-seq replicates by using the MANorm to filter out the inconsistent peaks (<https://www.ncbi.nlm.nih.gov/pmc/articles/PMC3439967/>). We used these ChIP peaks to identify 4,138 human gene targets using the same procedure as mentioned above. This third gene-set was named *SATB2\_Hipp* (S3 Table).

There is a considerable difference in gene number between the *SATB2\_Cort* and *SATB2\_Hipp* gene-sets. Factors contributing to this difference are likely to include the different functions of *SATB2* in the pre- and post-natal brain and that the ChIP-Seq data has been generated from different brain regions (cortex v hippocampus). In addition, the *SATB2* ChIP-Seq data was generated under different experimental conditions (tissue v primary neuronal

cultures) including use of different antibodies (anti-SATB2 v anti V5-tag antibody (ChIP-grade)). These details are supplied in [S8 Table](#).

Sets of 'brain-expressed' genes ( $n = 14,243$ ) and 'brain-elevated' genes ( $n = 1,424$ ) were sourced from the Human Protein Atlas (<https://www.proteinatlas.org/humanproteome/brain>) and used as covariates in the GSA. Brain-elevated genes are those that show an elevated expression in brain compared to other tissue types.

## GWAS data

Summary statistics from the most recent SZ GWAS [21] were obtained from the Walters group data repository on the MRC Centre for Neuropsychiatric Genetics and Genomics website (<http://walters.psychm.cf.ac.uk/>). This study included data on 40,675 cases and 64,643 controls. Summary statistics from the most recent EA GWAS [23] were obtained from the Social Science Genetic Association Consortium (SSDAG) website (<http://ssgac.org/Data.php>, Summary data file: EduYears\_Main.txt—discovery and replication cohorts except 23andMe). This study reported results for 328,917 individuals. Summary statistics from a GWAS of hippocampal volume ( $n = 33,536$ ; [32]) and a second GWAS of intracranial volume ( $n = 32,438$  [29]) were obtained from the ENIGMA Consortium website (<http://enigma.ini.usc.edu/>). GWAS summary statistics were sourced for AD [59], ADHD (<https://www.biorxiv.org/content/early/2017/06/03/145581>), ASD (<https://www.biorxiv.org/content/early/2017/11/27/224774>), BPD [60], CAD [61], CD [62], OCD [63], STR [64], T2D [65] and UC [66].

## Gene-set analysis

A gene-set analysis (GSA) is a statistical method for simultaneously analysing multiple genetic markers in order to determine their joint effect. We performed GSA using MAGMA [26] (<http://ctg.cncr.nl/software/magma>) and summary statistics from various GWAS. An analysis involved three steps. First, in the annotation step we mapped SNPs with available GWAS results on to genes (GRCh37/hg19 start-stop coordinates  $\pm 20$ kb). Second, in the gene analysis step we computed gene P values for each GWAS dataset. This gene analysis is based on a multiple linear principal components regression model that accounts for linkage disequilibrium (LD) between SNPs. The European panel of the 1000 Genomes data was used as a reference panel for LD. Third, a competitive GSA based on the gene P values, also using a regression structure, was used to test if the genes in a gene-set were more strongly associated with either phenotype than other genes in the genome. The MHC region is strongly associated in the SZ GWAS data. This region contains high LD and the association signal has been attributed to just a small number of independent variants [67]. However, MAGMA still identifies a very large number of associated genes despite factoring in the LD information. Of 278 genes that map to chromosome 6 (25–35Mb), 130 genes were associated with SZ in our MAGMA analysis. To avoid the excessive number of associated genes biasing the MAGMA GSA, we excluded all genes within the MHC region from our GSA of SZ. MAGMA was chosen because it corrects for LD, gene size and gene density (potential confounders) and has significantly more power than other GSA tools [68]. Numerical data used for all figures displaying MAGMA results are provided in [S9 Table](#).

## Analysis of gene-sets using rare variant data

A list of genes harbouring *de novo* variants identified in patients with SZ, autism spectrum disorder (ASD), intellectual disability (ID) and in unaffected siblings and controls were sourced from Fromer et al. [33]. We used the categories of variant as defined in that study (all, loss-of-function (LoF), non-synonymous (NS) and silent; gene number within each group is detailed

in Table 1). We sourced a list primary ID genes ( $n = 960$ ) from the curated SysID database of ID genes (<http://sysid.cmbi.umcn.nl/>) [69]. From an exome sequencing of 12,332 unrelated Swedish individuals (4,946 individuals with SZ), we sourced a list of 42 genes that had a significant excess of disruptive and damaging ultra-rare variants (dURVs) in SZ cases compared to controls [34]. We performed enrichment analysis of these gene lists with our gene-sets using 2x2 contingency tables with genes restricted to those annotated as protein coding using a background set of 19,424 genes (<https://www.ncbi.nlm.nih.gov/>). Bonferroni multiple test correction was performed separately for the tests of *de novo* variant genes ( $n = 48$  tests), for the tests of SysID genes ( $n = 3$ ) and for the tests of dURVs in SZ genes ( $n = 3$ ).

## Gene expression datasets and potentially synaptic genes

Human brain expression data from the Protein Atlas (<http://www.ProteinAtlas.org/humanproteome/brain/>) was used to filter the SATB2\_Hipp gene-set to only include genes expressed in the brain. This dataset included 14,540 genes expressed in, but not unique to, the human brain. For filtering SATB2 gene-sets to include only neuron-expressed genes, we used an RNA-Seq transcriptome and splicing database of glia, neurons, and vascular cells of the cerebral cortex [70]. We used RNA-Seq data from mouse neurons (<https://web.stanford.edu/group/barreslab/brainrnaseq.html>) and separated genes into three categories; low, medium and high expressed. Low expressed genes were those with Fragments Per Kilobase of transcript per Million mapped reads (FPKM) values  $< 2.0$  ( $n = 12,161$  genes). The median FPKM value for the remaining genes was 9.6, hence that was used to categorize medium and high expressed genes; medium (FPKM = 2.0–9.6;  $n = 5,107$  genes) and high (FPKM  $> 9.6$ ;  $n = 5,189$  genes). Mouse gene IDs were converted to human gene IDs using BioMart. For analysis of the SATB2\_Hipp gene-set, we used expression data from the hippocampus from pcw 37 to 1 year ( $n = 4$  samples) from the Brainspan Atlas of the Developing Human Brain (<http://www.brainspan.org/>). We calculated mean expression values and categorised genes as low (FPKM  $< 2.0$ ;  $n = 9,931$ ), medium (FPKM = 2.0–7.45;  $n = 5,619$ ) and high expressed (FPKM  $> 7.45$ ;  $n = 5,842$  genes). We followed a method previously outlined [34] to identify potentially synaptic genes.

## Functional annotation

ConsensusPathDB-human (<http://cpdb.molgen.mpg.de/>) was used to perform overrepresentation analysis of gene-sets and we report on enriched gene ontology-based sets[71].

## Supporting information

**S1 Fig. Venn diagram showing overlap of genes between SATB2+NuRD, SATB2\_Cort and SATB2\_Hipp gene-sets.** Seven genes (CACNA2D1, MYC, PTPRU, RELN, SKI, TOX and UNC5C) are common to all three gene-sets. Gene symbols for each gene-set and from each overlapping category are listed in S4 Table.

(TIF)

**S2 Fig. GSA of SATB2+NuRD in SZ, EA plus post-hoc analysis of 10 other GWAS datasets (6 brain-related phenotypes (AD, ADHD, ASD, BPD, OCD and STR) and 4 non-brain diseases (CAD, CD, T2D and UC)).** Phenotypes are listed on the y-axis. P-values are shown above each data point, which represent beta values (x-axis). Horizontal bars indicate standard error.

(TIF)

**S3 Fig. GSA of SATB2\_Cort in SZ, EA plus post-hoc analysis of 10 other GWAS datasets (6 brain-related phenotypes (AD, ADHD, ASD, BPD, OCD and STR) and 4 non-brain diseases (CAD, CD, T2D and UC)).** Phenotypes are listed on the y-axis. P-values are shown above each data point, which represent beta values (x-axis). Horizontal bars indicate standard error. (TIF)

**S4 Fig. GSA of SATB2\_Hipp in SZ, EA plus post-hoc analysis of 10 other GWAS datasets (6 brain-related phenotypes (AD, ADHD, ASD, BPD, OCD and STR) and 4 non-brain diseases (CAD, CD, T2D and UC)).** Phenotypes are listed on the y-axis. P-values are shown above each data point, which represent beta values (x-axis). Horizontal bars indicate standard error. (TIF)

**S5 Fig. GSA of SATB2\_Cort in brain volume GWAS data.** Gene-sets and number of genes are plotted on the y-axis. P-values are shown above each data point, which represent beta values (x-axis). Horizontal bars indicate standard error. GSA of SATB2\_Cort in intracranial volume GWAS data, including the partition of SATB2\_Cort genes into those target genes that were DE or not in P0 cortices of SATB2 WT v KO mice. (TIF)

**S6 Fig. GSA of SATB2\_Hipp in brain volume GWAS data.** Gene-sets and number of genes are plotted on the y-axis. P-values are shown above each data point, which represent beta values (x-axis). Horizontal bars indicate standard error. GSA of SATB2\_Hipp in hippocampal volume, including hippocampus expressed genes partitioned into SATB2+ and SATB2- and synaptic genes-sets partitioned into SATB2+ and SATB2-. (TIF)

**S1 Table. SATB2+NuRD gene-set list.**  
(XLSX)

**S2 Table. SATB2\_Cort gene-set list.**  
(XLSX)

**S3 Table. SATB2\_Hipp gene-set list.**  
(XLSX)

**S4 Table. Overlap between three SATB2 gene-sets.**  
(XLSX)

**S5 Table. MAGMA gene-analysis P-values for genes surviving Bonferroni correction in SZ and EA.**  
(XLSX)

**S6 Table. Full gene names, their known biology and associated phenotypes for associated genes from the SATB2\_NuRD and SATB2\_Cort gene-sets.**  
(XLSX)

**S7 Table. ConsensusPathDB over-representation analysis for SATB2\_Hipp (Bonferroni significant genes for EA).**  
(XLSX)

**S8 Table. Information on experimental parameters from previous CHIP-Seq studies that were used to generate the SATB2\_Cort and SATB2\_Hipp gene-sets.**  
(XLSX)

**S9 Table. Summary of MAGMA GSA for all gene-sets.**  
(XLSX)

## Author Contributions

**Conceptualization:** Derek W. Morris.

**Formal analysis:** Laura Whitton, Derek W. Morris.

**Funding acquisition:** Derek W. Morris.

**Investigation:** Laura Whitton, Galina Apostolova, Georg Dechant, Stephen Rea, Gary Donohoe, Derek W. Morris.

**Methodology:** Laura Whitton, Dietmar Rieder, Gary Donohoe, Derek W. Morris.

**Project administration:** Gary Donohoe, Derek W. Morris.

**Resources:** Galina Apostolova, Dietmar Rieder, Georg Dechant, Stephen Rea, Gary Donohoe, Derek W. Morris.

**Supervision:** Derek W. Morris.

**Writing – original draft:** Laura Whitton.

**Writing – review & editing:** Galina Apostolova, Georg Dechant, Stephen Rea, Gary Donohoe, Derek W. Morris.

## References

1. Kwan KY (2013) Transcriptional dysregulation of neocortical circuit assembly in ASD. *Int Rev Neurobiol* 113: 167–205. <https://doi.org/10.1016/B978-0-12-418700-9.00006-X> PMID: 24290386
2. Srinivasan K, Leone DP, Bateson RK, Dobreva G, Kohwi Y, et al. (2012) A network of genetic repression and derepression specifies projection fates in the developing neocortex. *Proceedings of the National Academy of Sciences of the United States of America* 109: 19071–19078. <https://doi.org/10.1073/pnas.1216793109> PMID: 23144223
3. Britanova O, Akopov S, Lukyanov S, Gruss P, Tarabykin V (2005) Novel transcription factor Satb2 interacts with matrix attachment region DNA elements in a tissue-specific manner and demonstrates cell-type-dependent expression in the developing mouse CNS. *Eur J Neurosci* 21: 658–668. <https://doi.org/10.1111/j.1460-9568.2005.03897.x> PMID: 15733084
4. Leone DP, Heavner WE, Ferenczi EA, Dobreva G, Huguenard JR, et al. (2014) Satb2 Regulates the Differentiation of Both Callosal and Subcerebral Projection Neurons in the Developing Cerebral Cortex. *Cereb Cortex*.
5. Harb K, Magrinelli E, Nicolas CS, Lukianets N, Frangeul L, et al. (2016) Area-specific development of distinct projection neuron subclasses is regulated by postnatal epigenetic modifications. *eLife* 5: e09531. <https://doi.org/10.7554/eLife.09531> PMID: 26814051
6. Zhou LQ, Wu J, Wang WT, Yu W, Zhao GN, et al. (2012) The AT-rich DNA-binding protein SATB2 promotes expression and physical association of human (G)gamma- and (A)gamma-globin genes. *J Biol Chem* 287: 30641–30652. <https://doi.org/10.1074/jbc.M112.355271> PMID: 22825848
7. Docker D, Schubach M, Menzel M, Munz M, Spaich C, et al. (2014) Further delineation of the SATB2 phenotype. *Eur J Hum Genet* 22: 1034–1039. <https://doi.org/10.1038/ejhg.2013.280> PMID: 24301056
8. García-López P, García-Marín V, Freire M (2006) Three-Dimensional Reconstruction and Quantitative Study of a Pyramidal Cell of a Cajal Histological Preparation. *The Journal of Neuroscience* 26: 11249–11252. <https://doi.org/10.1523/JNEUROSCI.3543-06.2006> PMID: 17079652
9. Chen Q, He G, Chen Q, Wu S, Xu Y, et al. (2005) A case-control study of the relationship between the metabotropic glutamate receptor 3 gene and schizophrenia in the Chinese population. *Schizophr Res* 73.
10. Molyneaux BJ, Arlotta P, Menezes JRL, Macklis JD (2007) Neuronal subtype specification in the cerebral cortex. *Nat Rev Neurosci* 8: 427–437. <https://doi.org/10.1038/nrn2151> PMID: 17514196



11. Alcamo EA, Chirivella L, Dautzenberg M, Dobрева G, Farinas I, et al. (2008) Satb2 regulates callosal projection neuron identity in the developing cerebral cortex. *Neuron* 57: 364–377. <https://doi.org/10.1016/j.neuron.2007.12.012> PMID: 18255030
12. Britanova O, de Juan Romero C, Cheung A, Kwan KY, Schwark M, et al. (2008) Satb2 is a postmitotic determinant for upper-layer neuron specification in the neocortex. *Neuron* 57: 378–392. <https://doi.org/10.1016/j.neuron.2007.12.028> PMID: 18255031
13. Jaitner C, Reddy C, Abentung A, Whittle N, Rieder D, et al. (2016) Satb2 determines miRNA expression and long-term memory in the adult central nervous system. *eLife* 5: e17361. <https://doi.org/10.7554/eLife.17361> PMID: 27897969
14. Li Y, You QL, Zhang SR, Huang WY, Zou WJ, et al. (2017) Satb2 Ablation Impairs Hippocampus-Based Long-Term Spatial Memory and Short-Term Working Memory and Immediate Early Genes (IEGs)-Mediated Hippocampal Synaptic Plasticity. *Mol Neurobiol*.
15. Baranek C, Dittrich M, Parthasarathy S, Bonnon CG, Britanova O, et al. (2012) Protooncogene Ski cooperates with the chromatin-remodeling factor Satb2 in specifying callosal neurons. *Proc Natl Acad Sci U S A* 109: 3546–3551. <https://doi.org/10.1073/pnas.1108718109> PMID: 22334647
16. Simon R, Brylka H, Schwegler H, Venkataramanappa S, Andratschke J, et al. (2012) A dual function of Bcl11b/Ctip2 in hippocampal neurogenesis. 2922–2936 p.
17. Brackertz M, Gong Z, Leers J, Renkawitz R (2006) p66 $\alpha$  and p66 $\beta$  of the Mi-2/NuRD complex mediate MBD2 and histone interaction. *Nucleic Acids Research* 34: 397–406. <https://doi.org/10.1093/nar/gkj437> PMID: 16415179
18. Torchy MP, Hamiche A, Klaholz BP (2015) Structure and function insights into the NuRD chromatin remodeling complex. *Cellular and Molecular Life Sciences* 72: 2491–2507. <https://doi.org/10.1007/s00018-015-1880-8> PMID: 25796366
19. Pergola G, Di Carlo P, D'Ambrosio E, Gelao B, Fazio L, et al. (2017) DRD2 co-expression network and a related polygenic index predict imaging, behavioral and clinical phenotypes linked to schizophrenia. *Transl Psychiatry* 7: e1006. <https://doi.org/10.1038/tp.2016.253> PMID: 28094815
20. Whitton L, Cosgrove D, Clarkson C, Harold D, Kendall K, et al. (2016) Cognitive analysis of schizophrenia risk genes that function as epigenetic regulators of gene expression. *Am J Med Genet B Neuropsychiatr Genet*.
21. Pardinas AF, Holmans P, Pocklington AJ, Escott-Price V, Ripke S, et al. (2018) Common schizophrenia alleles are enriched in mutation-intolerant genes and in regions under strong background selection. *Nat Genet* 50: 381–389. <https://doi.org/10.1038/s41588-018-0059-2> PMID: 29483656
22. Lencz T, Knowles E, Davies G, Guha S, Liewald DC, et al. (2014) Molecular genetic evidence for overlap between general cognitive ability and risk for schizophrenia: a report from the Cognitive Genomics Consortium (COGENT). *Mol Psychiatry* 19: 168–174. <https://doi.org/10.1038/mp.2013.166> PMID: 24342994
23. Okbay A, Beauchamp JP, Fontana MA, Lee JJ, Pers TH, et al. (2016) Genome-wide association study identifies 74 loci associated with educational attainment. *Nature* 533: 539–542. <https://doi.org/10.1038/nature17671> PMID: 27225129
24. McKenna WL, Ortiz-Londono CF, Mathew TK, Hoang K, Katzman S, et al. (2015) Mutual regulation between Satb2 and Fezf2 promotes subcerebral projection neuron identity in the developing cerebral cortex. *Proceedings of the National Academy of Sciences of the United States of America* 112: 11702–11707. <https://doi.org/10.1073/pnas.1504144112> PMID: 26324926
25. Lai AY, Wade PA (2011) Cancer biology and NuRD: a multifaceted chromatin remodelling complex. *Nat Rev Cancer* 11: 588–596. <https://doi.org/10.1038/nrc3091> PMID: 21734722
26. de Leeuw CA, Mooij JM, Heskes T, Posthuma D (2015) MAGMA: Generalized Gene-Set Analysis of GWAS Data. *PLOS Computational Biology* 11: e1004219. <https://doi.org/10.1371/journal.pcbi.1004219> PMID: 25885710
27. Schizophrenia Working Group of the Psychiatric Genomics C (2014) Biological insights from 108 schizophrenia-associated genetic loci. *Nature* 511: 421–427. <https://doi.org/10.1038/nature13595> PMID: 25056061
28. Zhang L, Song NN, Chen JY, Huang Y, Li H, et al. (2012) Satb2 is required for dendritic arborization and soma spacing in mouse cerebral cortex. *Cereb Cortex* 22: 1510–1519. <https://doi.org/10.1093/cercor/bhr215> PMID: 21885532
29. Adams HHH, Hibar DP, Chouraki V, Stein JL, Nyquist PA, et al. (2016) Novel genetic loci underlying human intracranial volume identified through genome-wide association. *Nat Neurosci* 19: 1569–1582. <https://doi.org/10.1038/nn.4398> PMID: 27694991
30. Buckner RL, Head D, Parker J, Fotenos AF, Marcus D, et al. (2004) A unified approach for morphometric and functional data analysis in young, old, and demented adults using automated atlas-based head

size normalization: reliability and validation against manual measurement of total intracranial volume. *Neuroimage* 23: 724–738. <https://doi.org/10.1016/j.neuroimage.2004.06.018> PMID: 15488422

31. Farias ST, Mungas D, Reed B, Carmichael O, Beckett L, et al. (2012) Maximal brain size remains an important predictor of cognition in old age, independent of current brain pathology. *Neurobiol Aging* 33: 1758–1768. <https://doi.org/10.1016/j.neurobiolaging.2011.03.017> PMID: 21531482
32. Hibar DP, Adams HHH, Jahanshad N, Chauhan G, Stein JL, et al. (2017) Novel genetic loci associated with hippocampal volume. *Nature Communications* 8: 13624. <https://doi.org/10.1038/ncomms13624> PMID: 28098162
33. Fromer M, Pocklington AJ, Kavanagh DH, Williams HJ, Dwyer S, et al. (2014) De novo mutations in schizophrenia implicate synaptic networks. *Nature* 506: 179–184. <https://doi.org/10.1038/nature12929> PMID: 24463507
34. Genovese G, Fromer M, Stahl EA, Ruderfer DM, Chambert K, et al. (2016) Increased burden of ultra-rare protein-altering variants among 4,877 individuals with schizophrenia. *Nat Neurosci* 19: 1433–1441. <https://doi.org/10.1038/nn.4402> PMID: 27694994
35. Tonini R, Ferraro T, Sampedro-Castañeda M, Cavaccini A, Stocker M, et al. (2013) Small-conductance Ca(2+)-activated K(+) channels modulate action potential-induced Ca(2+) transients in hippocampal neurons. *Journal of Neurophysiology* 109: 1514–1524. <https://doi.org/10.1152/jn.00346.2012> PMID: 23255726
36. Saito K, Kakizaki T, Hayashi R, Nishimaru H, Furukawa T, et al. (2010) The physiological roles of vesicular GABA transporter during embryonic development: a study using knockout mice. *Molecular Brain* 3: 40–40. <https://doi.org/10.1186/1756-6606-3-40> PMID: 21190592
37. Gerges NZ, Backos DS, Rupasinghe CN, Spaller MR, Esteban JA (2006) Dual role of the exocyst in AMPA receptor targeting and insertion into the postsynaptic membrane. *EMBO J* 25: 1623–1634. <https://doi.org/10.1038/sj.emboj.7601065> PMID: 16601687
38. Srivatsa S, Parthasarathy S, Britanova O, Bormuth I, Donahoo AL, et al. (2014) Unc5C and DCC act downstream of Ctip2 and Satb2 and contribute to corpus callosum formation. *Nat Commun* 5: 3708. <https://doi.org/10.1038/ncomms4708> PMID: 24739528
39. Betancourt J, Katzman S, Chen B (2014) Nuclear factor one B regulates neural stem cell differentiation and axonal projection of corticofugal neurons. *J Comp Neurol* 522: 6–35. <https://doi.org/10.1002/cne.23373> PMID: 23749646
40. Piper M, Dawson AL, Lindwall C, Barry G, Plachez C, et al. (2007) Emx and Nfi genes regulate cortical development and axon guidance in the telencephalon. *Novartis Found Symp* 288: 230–242; discussion 242–235, 276–281. PMID: 18494262
41. Piper M, Moldrich RX, Lindwall C, Little E, Barry G, et al. (2009) Multiple non-cell-autonomous defects underlie neocortical callosal dysgenesis in Nfib-deficient mice. *Neural Dev* 4: 43. <https://doi.org/10.1186/1749-8104-4-43> PMID: 19961580
42. Punwani D, Zhang Y, Yu J, Cowan MJ, Rana S, et al. (2016) Multisystem Anomalies in Severe Combined Immunodeficiency with Mutant BCL11B. *New England Journal of Medicine* 375: 2165–2176. <https://doi.org/10.1056/NEJMoa1509164> PMID: 27959755
43. Huang TN, Chuang HC, Chou WH, Chen CY, Wang HF, et al. (2014) Tbr1 haploinsufficiency impairs amygdalar axonal projections and results in cognitive abnormality. *Nat Neurosci* 17: 240–247. <https://doi.org/10.1038/nn.3626> PMID: 24441682
44. McKenna WL, Betancourt J, Larkin KA, Abrams B, Guo C, et al. (2011) Tbr1 and Fezf2 regulate alternate corticofugal neuronal identities during neocortical development. *J Neurosci* 31: 549–564. <https://doi.org/10.1523/JNEUROSCI.4131-10.2011> PMID: 21228164
45. Apará A, Galvao J, Wang Y, Blackmore M, Trillo A, et al. (2017) KLF9 and JNK3 Interact to Suppress Axon Regeneration in the Adult CNS. *The Journal of Neuroscience* 37: 9632–9644. <https://doi.org/10.1523/JNEUROSCI.0643-16.2017> PMID: 28871032
46. Chen YC, Kuo HY, Bornschein U, Takahashi H, Chen SY, et al. (2016) Foxp2 controls synaptic wiring of corticostriatal circuits and vocal communication by opposing Mef2c. *Nat Neurosci* 19: 1513–1522. <https://doi.org/10.1038/nn.4380> PMID: 27595386
47. Vernes SC, Oliver PL, Spiteri E, Lockstone HE, Puliyadi R, et al. (2011) Foxp2 regulates gene networks implicated in neurite outgrowth in the developing brain. *PLoS Genet* 7: e1002145. <https://doi.org/10.1371/journal.pgen.1002145> PMID: 21765815
48. Pischedda F, Piccoli G (2015) The IgLON Family Member Negr1 Promotes Neuronal Arborization Acting as Soluble Factor via FGFR2. *Front Mol Neurosci* 8: 89. <https://doi.org/10.3389/fnmol.2015.00089> PMID: 26793057

49. Lu HC, Tan Q, Rousseaux MW, Wang W, Kim JY, et al. (2017) Disruption of the ATXN1-CIC complex causes a spectrum of neurobehavioral phenotypes in mice and humans. *Nat Genet* 49: 527–536. <https://doi.org/10.1038/ng.3808> PMID: 28288114
50. Moore JM, Oliver PL, Finelli MJ, Lee S, Lickiss T, et al. (2014) Laf4/Aff3, a Gene Involved in Intellectual Disability, Is Required for Cellular Migration in the Mouse Cerebral Cortex. *PLOS ONE* 9: e105933. <https://doi.org/10.1371/journal.pone.0105933> PMID: 25162227
51. Rajkovich KE, Loerwald KW, Hale CF, Hess CT, Gibson JR, et al. (2017) Experience-Dependent and Differential Regulation of Local and Long-Range Excitatory Neocortical Circuits by Postsynaptic Mef2c. *Neuron* 93: 48–56. <https://doi.org/10.1016/j.neuron.2016.11.022> PMID: 27989458
52. Leslie JR, Imai F, Fukuhara K, Takegahara N, Rizvi TA, et al. (2011) Ectopic myelinating oligodendrocytes in the dorsal spinal cord as a consequence of altered semaphorin 6D signaling inhibit synapse formation. *Development (Cambridge, England)* 138: 4085–4095.
53. Yoshida Y, Han B, Mendelsohn M, Jessell TM (2006) PlexinA1 signaling directs sensory axon segregation in the developing spinal cord: a role for proprioceptive axon exclusion in cutaneous afferent organization. *Neuron* 52: 775–788. <https://doi.org/10.1016/j.neuron.2006.10.032> PMID: 17145500
54. Huang Y, Song NN, Lan W, Hu L, Su CJ, et al. (2013) Expression of transcription factor Satb2 in adult mouse brain. *Anat Rec (Hoboken)* 296: 452–461.
55. Deary IJ, Strand S, Smith P, Fernandes C (2007) Intelligence and educational achievement. *Intelligence* 35: 13–21.
56. Zarate YA, Fish JL (2017) SATB2-associated syndrome: Mechanisms, phenotype, and practical recommendations. *American Journal of Medical Genetics Part a* 173: 327–337. <https://doi.org/10.1002/ajmg.a.38022> PMID: 27774744
57. Talkowski ME, Rosenfeld JA, Blumenthal I, Pillalamarri V, Chiang C, et al. (2012) Sequencing chromosomal abnormalities reveals neurodevelopmental loci that confer risk across diagnostic boundaries. *Cell* 149: 525–537. <https://doi.org/10.1016/j.cell.2012.03.028> PMID: 22521361
58. McLean CY, Bristor D, Hiller M, Clarke SL, Schaar BT, et al. (2010) GREAT improves functional interpretation of cis-regulatory regions. *Nat Biotech* 28: 495–501.
59. Lambert JC, Ibrahim-Verbaas CA, Harold D, Naj AC, Sims R, et al. (2013) Meta-analysis of 74,046 individuals identifies 11 new susceptibility loci for Alzheimer's disease. *Nat Genet* 45: 1452–1458. <https://doi.org/10.1038/ng.2802> PMID: 24162737
60. Group PGCBWD (2011) Large-scale genome-wide association analysis of bipolar disorder identifies a new susceptibility locus near ODZ4. *Nat Genet* 43: 977–983. <https://doi.org/10.1038/ng.943> PMID: 21926972
61. Schunkert H, König IR, Kathiresan S, Reilly MP, Assimes TL, et al. (2011) Large-scale association analysis identifies 13 new susceptibility loci for coronary artery disease. *Nat Genet* 43: 333–338. <https://doi.org/10.1038/ng.784> PMID: 21378990
62. Franke A, McGovern DP, Barrett JC, Wang K, Radford-Smith GL, et al. (2010) Genome-wide meta-analysis increases to 71 the number of confirmed Crohn's disease susceptibility loci. *Nat Genet* 42: 1118–1125. <https://doi.org/10.1038/ng.717> PMID: 21102463
63. (OCGAS) IOCDFGCI-GaOCGAS (2017) Revealing the complex genetic architecture of obsessive-compulsive disorder using meta-analysis. *Mol Psychiatry*.
64. Traylor M, Farrall M, Holliday EG, Sudlow C, Hopewell JC, et al. (2012) Genetic risk factors for ischaemic stroke and its subtypes (the METASTROKE collaboration): a meta-analysis of genome-wide association studies. *Lancet Neurol* 11: 951–962. [https://doi.org/10.1016/S1474-4422\(12\)70234-X](https://doi.org/10.1016/S1474-4422(12)70234-X) PMID: 23041239
65. Mahajan A, Go MJ, Zhang W, Below JE, Gaulton KJ, et al. (2014) Genome-wide trans-ancestry meta-analysis provides insight into the genetic architecture of type 2 diabetes susceptibility. *Nat Genet* 46: 234–244. <https://doi.org/10.1038/ng.2897> PMID: 24509480
66. Anderson CA, Boucher G, Lees CW, Franke A, D'Amato M, et al. (2011) Meta-analysis identifies 29 additional ulcerative colitis risk loci, increasing the number of confirmed associations to 47. *Nat Genet* 43: 246–252. <https://doi.org/10.1038/ng.764> PMID: 21297633
67. Sekar A, Bialas AR, de Rivera H, Davis A, Hammond TR, et al. (2016) Schizophrenia risk from complex variation of complement component 4. *Nature* 530: 177–183. <https://doi.org/10.1038/nature16549> PMID: 26814963
68. de Leeuw CA, Neale BM, Heskes T, Posthuma D (2016) The statistical properties of gene-set analysis. *Nat Rev Genet* 17: 353–364. <https://doi.org/10.1038/nrg.2016.29> PMID: 27070863
69. Kochinke K, Zweier C, Nijhof B, Fenckova M, Cizek P, et al. (2016) Systematic Phenomics Analysis Deconvolutes Genes Mutated in Intellectual Disability into Biologically Coherent Modules. *American Journal of Human Genetics* 98: 149–164. <https://doi.org/10.1016/j.ajhg.2015.11.024> PMID: 26748517

70. Zhang Y, Chen K, Sloan SA, Bennett ML, Scholze AR, et al. (2014) An RNA-Sequencing Transcriptome and Splicing Database of Glia, Neurons, and Vascular Cells of the Cerebral Cortex. *The Journal of Neuroscience* 34: 11929–11947. <https://doi.org/10.1523/JNEUROSCI.1860-14.2014> PMID: [25186741](https://pubmed.ncbi.nlm.nih.gov/25186741/)
71. Herwig R, Hardt C, Lienhard M, Kamburov A (2016) Analyzing and interpreting genome data at the network level with ConsensusPathDB. *Nat Protocols* 11: 1889–1907. <https://doi.org/10.1038/nprot.2016.117> PMID: [27606777](https://pubmed.ncbi.nlm.nih.gov/27606777/)
