# Supplementary material for: Genes regulated by SATB2 during neurodevelopment contribute to schizophrenia and educational attainment
Source: PLoS Genet. 2018 Jul 24;14(7):e1007515. doi: 10.1371/journal.pgen.1007515 (PMC6097700; doi:10.1371/journal.pgen.1007515)
Supplement: S2 Table — (XLSX) [file pgen.1007515.s008.xlsx]

## Sheet: S2_Table
S2 Table: SATB2_Cort gene-set list
SATB2_Cort Gene Symbol
AANAT
AASDH
ABHD17B
ABHD2
ABTB2
AC005338.1
AC007192.4
AC025335.1
AC090498.1
ACAA2
ACIN1
ACKR3
ACO1
ACTBL2
ADAM15
ADAMTS18
ADAMTS6
ADCK1
ADGRL2
ADK
ADTRP
AFF3
AGA
AGBL1
AIP
AK8
AKAP10
AKAP7
AL513412.1
ALCAM
ALK
ALOXE3
ALPK1
AMER3
ANGPTL2
ANK2
ANKRD6
ANO1
ANO6
ANXA5
ARFGAP2
ARG1
ARGLU1
ARHGAP17
ARHGEF4
ARID1A
ARID1B
ARL15
ARL3
ARL6IP6
ARRDC4
ASCL1
ASTN2
ATAD2
ATE1
ATF7
ATF7IP
ATG13
ATP5L
ATP5L2
ATP8A2
ATP8B1
ATRNL1
ATXN1
ATXN10
B3GAT1
B3GNT1
B4GAT1
BAHCC1
BCAT1
BCL2L11
BCLAF1
BLM
BMI1
BMPER
BMPR1A
BMPR1B
BRMS1
BRPF1
BRSK2
BTBD17
BTBD3
BTG1
C11orf49
C11orf71
C11orf87
C11orf91
C14orf119
C15orf41
C1orf198
C1orf87
C1QL3
C1QTNF6
C21orf62
C2orf40
C3orf14
C5
C6orf118
CA8
CABIN1
CACHD1
CACNA2D1
CACNG5
CADM2
CAMK1G
CAMK2D
CAPN6
CAPN9
CARTPT
CASD1
CCDC129
CCDC34
CCDC50
CCNG2
CCNH
CCSER1
CD180
CD24
CDC27
CDCA7
CDCA7L
CDH10
CDH7
CDH8
CDK17
CDK5RAP3
CDKAL1
CELF2
CELF4
CENPC
CENPU
CENPU
CEP128
CEP350
CEP44
CERS5
CGNL1
CHCHD3
CHD2
CHD9
CHIC2
CHMP2A
CHRM2
CIR1
CLDN20
CLEC14A
CLIP2
CLIP4
CMC1
CNTN5
CNTNAP4
COL4A3
COMMD3
COMMD3-BMI1
COPS8
COPZ2
CPB2
CPE
CPN2
CRB1
CRB2
CREB1
CREB5
CRTC3
CRY1
CRYGD
CS
CSMD1
CSNK1G1
CSNK1G3
CST1
CST2
CST4
CST5
CTBP2
CTNNB1
CTSC
CTTN
CXADR
CYP2J2
DAZL
DCAF8
DCBLD1
DCLRE1A
DCX
DDR1
DDX10
DEAF1
DEF8
DEGS1
DENND1A
DENND1B
DIAPH3
DIO2
DIRAS2
DKK3
DLGAP1
DLX6
DNAH11
DNAJC18
DNAJC19
DNAJC24
DNAJC5B
DOK5
DPH6
DPYD
DTD2
E2F7
EBAG9
EDNRB
EEA1
EEF1B2
EFNB2
EGLN3
EIF4G3
ELAVL2
ELK3
ELOVL5
ENC1
ENTPD2
EOMES
EPHA3
EPHA5
EPHB1
ERCC4
ERLIN2
ESCO1
ESR2
ETNK1
ETV6
EXOC4
EXTL3
EZR
FABP7
FADD
FAM107B
FAM110B
FAM13C
FAM173B
FAM174B
FAM184B
FAM49A
FAM50B
FAM53B
FAM92A
FAM98A
FANCF
FARS2
FAT3
FBXL19
FBXL7
FBXO8
FBXW7
FEZ1
FGD6
FGFR2
FGGY
FIGN
FKBPL
FNIP2
FOXP1
FOXP2
FREM2
FRMD4A
FRY
FUT9
FYN
FZD8
G2E3
GAD1
GADD45G
GALC
GALNT7
GALNTL6
GAPVD1
GAREM1
GATB
GATSL2
GCLC
GDPD5
GFRA1
GLCCI1
GLRX3
GMPR
GNA11
GNA14
GOPC
GPAT3
GPM6B
GPR142
GPR151
GPR39
GPSM3
GRAMD3
GREB1L
GREM1
GREM2
GRHPR
GRIA1
GRID1
GRM5
GSK3B
GTF2A1
GTF3C4
GUCY1B2
H2AFB1
H2AFB2
H2AFB3
HABP2
HACE1
HAPLN1
HARBI1
HAS2
HDAC9
HDGFL1
HEG1
HES1
HGF
HIST1H4D
HIST1H4F
HIST2H4A
HMCN1
HMGA2
HMGN3
HOOK1
ID2
IL12A
IMPA1
IMPACT
INHBA
INO80
INPP5F
INSC
INSM1
INTU
IQCJ-SCHIP1
IRX2
IRX4
ISL1
ITGA1
ITGB1
IVNS1ABP
IZUMO1R
JAZF1
JUN
KAT6B
KCNH7
KCNJ2
KCNK2
KCNN2
KCTD3
KDM3A
KDM4C
KDM7A
KHDRBS2
KIAA0040
KIAA1161
KIAA1211
KIAA1549L
KIDINS220
KIF16B
KIRREL3
KIZ
KLF18
KLF3
KLF6
KLF7
KLF9
KMT2A
KMT5C
LCP1
LDB2
LGR4
LHPP
LIMA1
LINC00998
LINGO2
LIPG
LIPI
LIX1
LLPH
LMX1A
LNPEP
LNX1
LRGUK
LRRC40
LRRC4C
LRRC7
LRRC9
LRRN3
LRRTM1
LUZP2
LYPD6
LYPD6B
LYPLAL1
MAGI3
MALT1
MAP1B
MAP2
MAPKAP1
MARCKS
MARK2
MAT2B
MATN1
MBOAT7
MCMBP
MCPH1
MDFIC
MED28
MEF2C
MEGF9
MEIS2
MEP1B
MFF
MFGE8
MGMT
MIDN
MLC1
MLLT3
MMRN1
MMS22L
MND1
MOV10L1
MPDZ
MPPED2
MSI2
MTA2
MTNR1B
MVB12B
MYC
MYL4
MYO16
MYT1L
MYZAP
N6AMT1
NALCN
NARS2
NAT10
NAV3
NCK2
NDUFS1
NEBL
NEDD1
NEDD4L
NEGR1
NEIL3
NEK6
NEK7
NEUROD1
NEUROG2
NFE2L3
NFIA
NFIB
NHLRC2
NINL
NKX6-1
NMU
NMUR2
NNMT
NOCT
NOX3
NPHP3
NPHP3-ACAD11
NPSR1
NR2C1
NR2E1
NR2E3
NR2F2
NR5A2
NRN1
NRP1
NRP2
NRSN1
NRXN3
NSMAF
NTNG1
NUDT2
NUDT7
NUF2
NUFIP1
OLFM4
OMA1
OPCML
OTX2
PABPC1
PABPC3
PACRG
PAG1
PALLD
PALMD
PAM
PANK2
PANX1
PARD3B
PAUPAR
PAX6
PBX1
PBX3
PCDH18
PCDH8
PCDH9
PCSK5
PDCL2
PDE12
PDE4B
PDLIM3
PDZRN3
PEA15
PEX2
PGK1
PGPEP1L
PHIP
PHTF1
PHYHIPL
PIGY
PIH1D3
PIK3R1
PIK3R2
PIPOX
PITPNB
PITRM1
PKNOX2
PLCB1
PLCB4
PLK2
PLN
PLPP3
PLS1
PLXNA2
PMPCB
POC5
POU2F1
PPIP5K2
PPM1L
PPP1R17
PPP1R18
PPP1R37
PPP1R3A
PPP2R2B
PRCP
PRDM1
PREP
PREX1
PRIM2
PRKCA
PRKD1
PROS1
PRPF19
PRPF4B
PSMB7
PTBP2
PTER
PTN
PTPRG
PTPRK
PTPRS
PTPRT
PTPRU
QKI
QRFPR
RABEP2
RAD51B
RALGAPA2
RALGPS1
RAPGEF2
RBFOX1
RBFOX2
RCN1
RCOR1
RDH14
REG1A
REG1B
REG3A
REG3G
RELN
REV1
RFK
RFTN1
RFX3
RGS7
RILPL2
RNASEH2B
RNF180
RNF26
ROBO1
ROBO2
RP11-146B14.1
RP11-176H8.1
RP11-215A19.2
RP11-231I13.2
RP11-249L12.1
RP11-793H13.10
RP1-179P9.3
RPL14
RPL28
RPL38
RPL41
RPRM
RPS29
RRAGD
RSBN1
RTTN
RXFP2
S1PR1
SALL3
SASH1
SCAF11
SCG5
SCRN3
SDK2
SEC23A
SEL1L
SEMA3A
SEMA3E
SERTAD2
SETBP1
SETD1A
SFRP1
SFSWAP
SFXN2
SGCE
SGIP1
SH3RF3
SHANK2
SHFM1
SHISA2
SHOX2
SIVA1
SKI
SLAIN1
SLAMF6
SLC12A8
SLC15A2
SLC17A6
SLC1A4
SLC24A2
SLC26A5
SLC30A10
SLC35F1
SLC35F5
SLC37A3
SLC38A1
SLC4A3
SLC7A11
SNCAIP
SNHG5
SNRNP35
SNTB1
SNX12
SNX2
SNX3
SOCS6
SORBS2
SOX2
SOX2-OT
SOX4
SOX5
SOX6
SP3
SP4
SP8
SPAG9
SPATA24
SPATS2
SPECC1
SPRY2
SPTLC3
SPTSSA
SREBF1
SSFA2
ST3GAL1
ST3GAL4
STAT3
STAT5A
STPG2
STX16-NPEPL1
SULF2
SUSD2
SV2C
SYBU
SYNE2
SYT11
SYTL3
TADA1
TAPT1
TAS2R1
TBC1D1
TBC1D4
TBC1D9B
TCERG1L
TCF12
TCF7L2
TCTEX1D1
TENM4
TEX29
TEX35
TEX36
TFB1M
TGIF1
THEMIS
THSD4
TIAM2
TLE1
TLL1
TLR1
TMEM108
TMEM132B
TMEM161B
TMEM182
TMEM2
TMEM238
TMEM260
TMEM38B
TMEM80
TMPO
TMTC4
TNP1
TNR
TNS1
TOM1L2
TOX
TOX3
TPD52
TPRA1
TRAF1
TRIM2
TRIM32
TRIO
TRIP4
TRPC1
TRPM3
TSEN34
TSHR
TSSC1
TTC28
TUBA1A
U2AF2
UBE2M
UBE2U
UBTD2
UBXN2B
UFL1
UNC5C
UNC5D
UNKL
USP24
USP25
USP47
USP6NL
VANGL2
VAV3
VCAN
VEPH1
VGLL3
VPS13A
VPS13D
WAC
WDFY2
WDR11
WISP3
WRN
WT1
YIPF5
YIPF6
ZBTB10
ZC3H4
ZCCHC7
ZFP36L1
ZHX3
ZMAT4
ZNF143
ZNF462
ZNF518A
ZNF532
ZNF608
ZNF703
ZNF704
ZSCAN2
